# Supplementary material for: Adaptive servo ventilation for sleep apnoea in heart failure: the FACE study 3-month data
Source: HighWire-hosted journal article supplement (doi:10.1136/thoraxjnl-2021-217205), 2021-07-06
Supplement: thoraxjnl-2021-217205supp001_data_supplement.pdf [file thoraxjnl-2021-217205supp001_data_supplement.pdf]

## Supplementary file

### Steering committee members:

Prof. Marie-Pia d'Ortho (APHP, Bichat hospital, Paris) : PI, Study Coordinator

Prof. Jean-Louis Pépin (Grenoble Alpes hospital, Grenoble)

Prof. Jean-Marc Davy (Montpellier University Hospital, Montpellier)

Prof. Thibaud Damy (APHP, Mondor Hospital, Créteil)

Prof. Renaud Tamisier (Grenoble Alpes Hospital, Grenoble)

### FACE study investigators

Dr ATTALI Valérie, Pitié Salpêtrière University Hospital, APHP, Paris, France

Dr BALICE Maria-Anna, Jacques Cartier Hospital, Massy, France

Dr BARTHEL Laurent, Cardiologist private practice, Strasbourg, France

Dr BUENDIA Rosa, Beziers Hospital, Beziers, France

Pr BUYSE Bertien, Leuven University Hospital, Leuven, Belgium

Dr BOYER Laurent, Henri Mondor University Hospital, Créteil, France

Dr CADARS Marie-Pierre, Beziers Hospital, Beziers, France

Dr CORNEC Pascal, Morlaix Hospital, Morlaix, France

Pr DAMY Thibaud, Henri Mondor University Hospital, Créteil, France

Pr DAVY Jean-Marc, Montpellier University Hospital, Montpellier, France

Dr DE FAVERGES Geoffroy, Nevers Hospital, Nevers, France

Dr DIDI Toufik, Annecy Hospital, Annecy, France

Pr d'ORTHO Marie-Pia, Bichat University Hospital, APHP, Paris, France

Pr GAGNADOUX Frédéric, Angers University Hospital, Angers, France

Dr GENTINA Thibaud, La Louvière Hospital, Lille, France

Dr GOUPIL François, Le Mans Hospital, Le Mans, France

Dr GOUTORBE Frédéric, Beziers Hospital, Beziers, France

Dr GUILLEMOT Jean-Maurice, Lorient Hospital, Lorient, France

Dr IAMANDI Carmen, Mulhouse Hospital, Mulhouse, France

Pr ISNARD Richard, Pitié Salpêtrière University Hospital, APHP, Paris, France

Dr JOUNIEAUX François, La Louvière Hospital, Lille, France

Dr KOLTES Christian, Sleep Center, Metz, France

Dr Le COZ Alain, Lorient Hospital, Lorient, France

Dr LEQUEUX Benoit, Poitiers University Hospital, Poitiers, France

Dr LEREST René, Morlaix Hospital, Morlaix, France

Dr LEROUSSEAU Lionel, Antibes Hospital, Antibes, France

Dr MALLET Jean-Pierre, Montpellier University Hospital, Montpellier, France

Dr MARTIN Francis, Pitié Salpêtrière University Hospital, APHP, Paris, France

Pr MEURICE Jean-Claude, Poitiers University Hospital, Poitiers, France

Dr NOROC Ala, CHU Henri Mondor, Créteil, France

Dr ORTUNO Frédéric, Clinique Rhône Durance, Avignon, France

Dr PALOT Alain, Saint Joseph Hospital, Marseille, France

Dr PAPOLA Philippe, Cardiologist private practice, Amnéville, France

Dr PARIS Audrey, Le Mans Hospital, Le Mans, France

Dr PASTINELLI Hélène, Hôpital Jacques Cartier, Massy, France

Pr PEPIN Jean-Louis, Grenoble Alpes University Hospital, Grenoble, France

Dr PERRIN Christophe, Cannes Hospital, Cannes, France

Dr PHILIPPE Carole, Pitié Salpêtrière University Hospital, APHP, Paris, France

Dr PONTIER Sandrine, Toulouse University Hospital, Toulouse, France

Dr PRIGENT Arnaud, Clinique Saint Laurent, Rennes, France

Dr PRIOU Pascaline, Saumur Hospital, Saumur, France

Dr PUEL Vincent, Clinique Bel Air, Bordeaux, France

Dr RABEC Claudio, Dijon University Hospital, Dijon, France

Dr RICHARD Benjamin, Annecy Hospital, Annecy, France

Dr RICHARD Claude, Saumur Hospital, Saumur, France

Dr RUTTEN Marijke, Academic Sleep Clinic, CIRO, Horn, Netherlands

Dr SASTRY Manuel, Academic Sleep Clinic, CIRO, Horn, Netherlands

Dr SALVAT Murielle, Grenoble Alpes University Hospital, Grenoble, France

Dr SEDKAOUI Kamila, Toulouse University Hospital, Toulouse, France

Pr SHIVALIKAR Bharati, Antwerp University Hospital, Antwerp, Belgium

Pr TAMISIER Renaud, Grenoble Alpes University Hospital, Grenoble, France

Pr TESTELMANS Dries, Leuven University Hospital, Leuven, Belgium

Pr VERBRAECKEN Johan, Antwerp University Hospital, Antwerp, Belgium
